# Supplementary material for: Ibuprofen prevents progression of ataxia telangiectasia symptoms in ATM-deficient mice
Source: Springer Nature journal article supplement (doi:10.1186/s12974-018-1338-7), 2018-11-06

**Atm<sup>+/+</sup>**

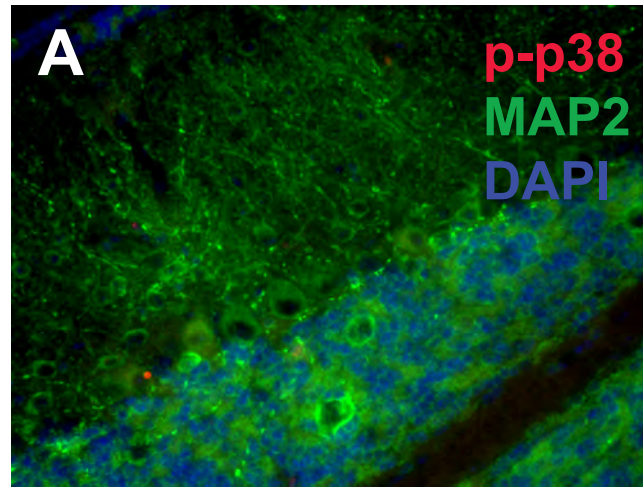

**Atm<sup>+/+</sup> (Ibu)**

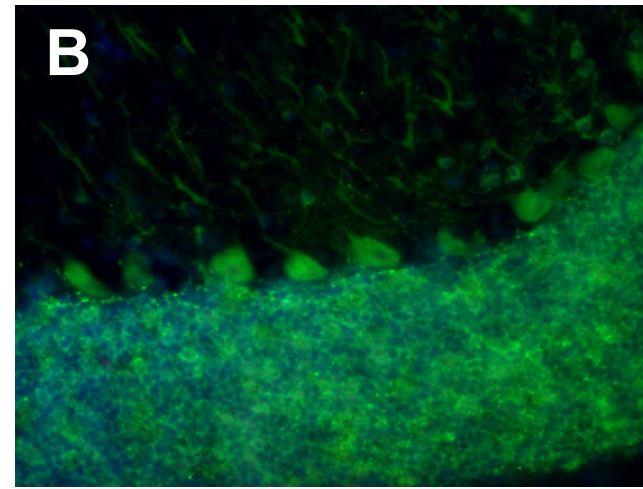

**Atm<sup>+/+</sup> (LPS)**

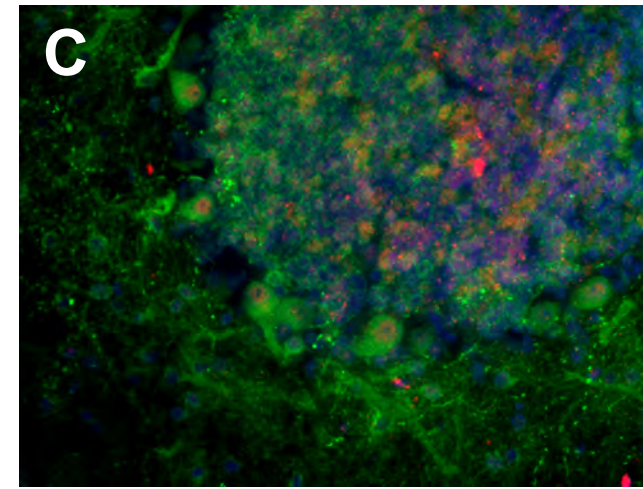

**Atm<sup>+/+</sup> (LPS+Ibu)**

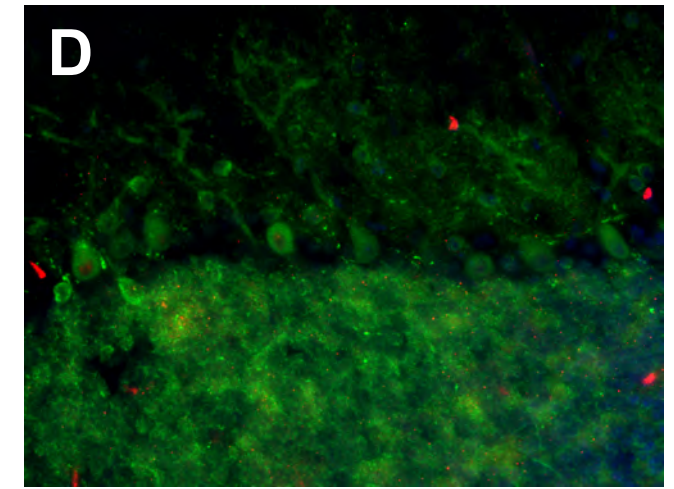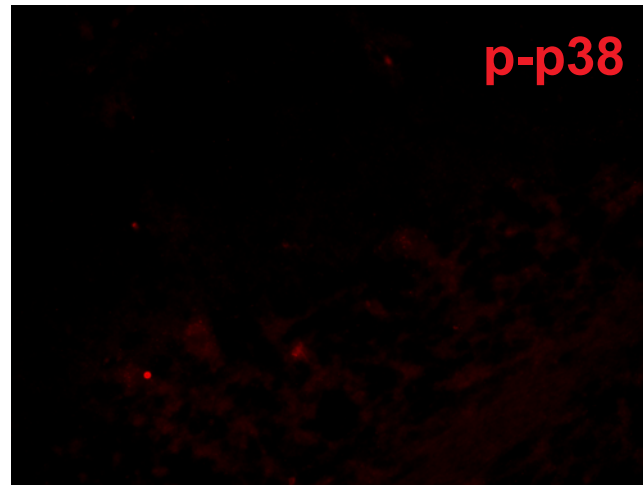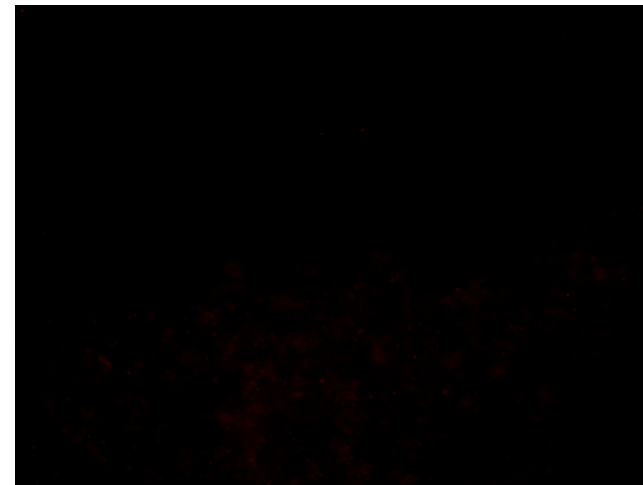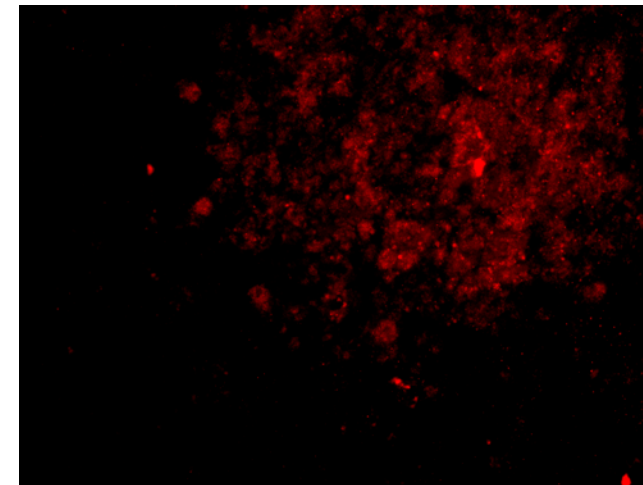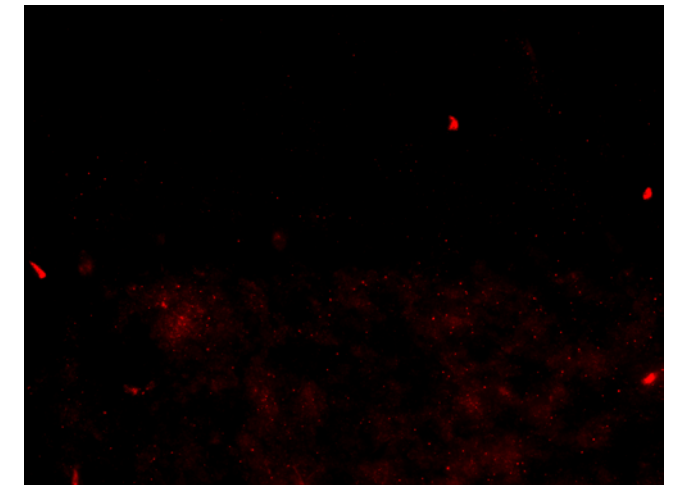

**Atm<sup>-/-</sup>**

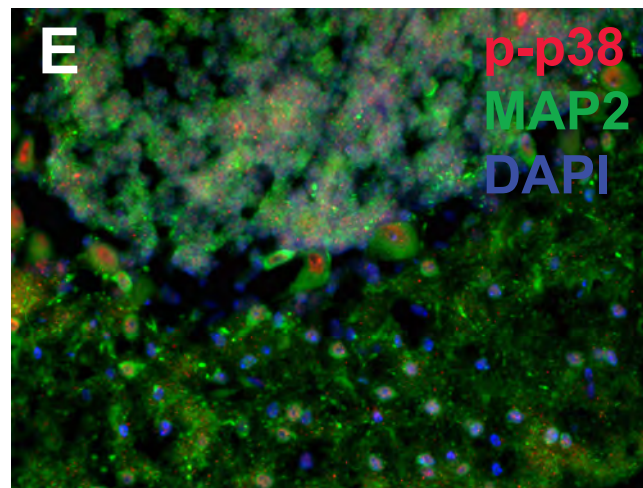

**Atm<sup>-/-</sup> (Ibu)**

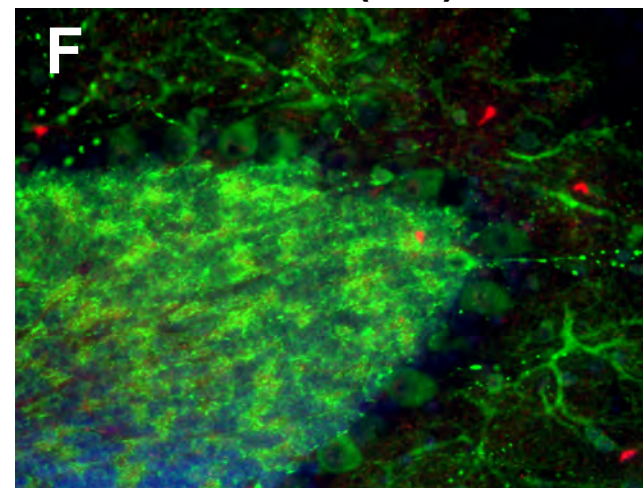

**Atm<sup>-/-</sup> (LPS)**

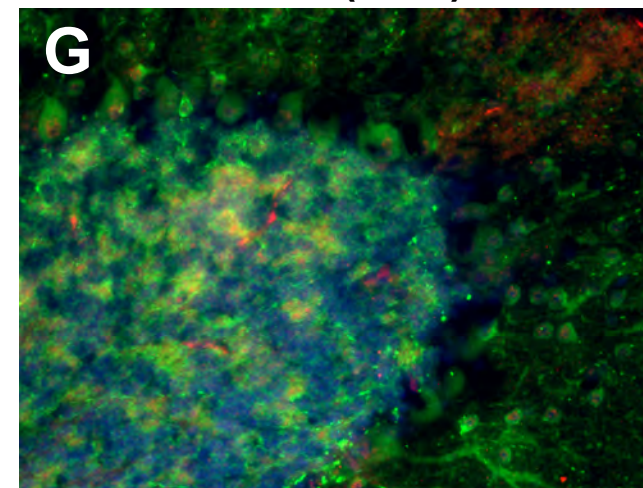

**Atm<sup>-/-</sup> (LPS+Ibu)**

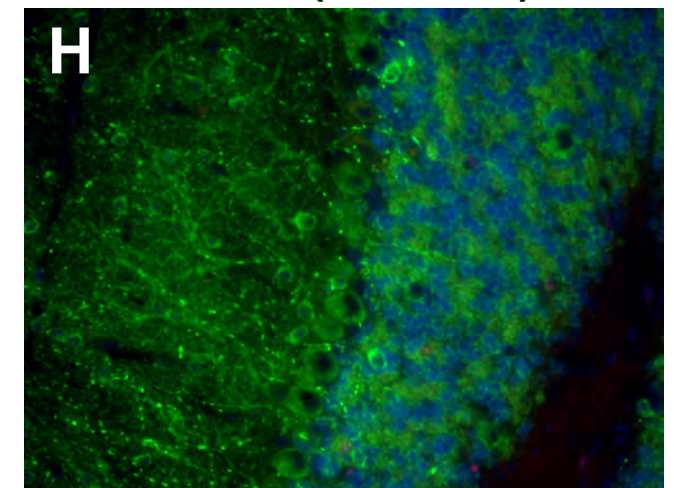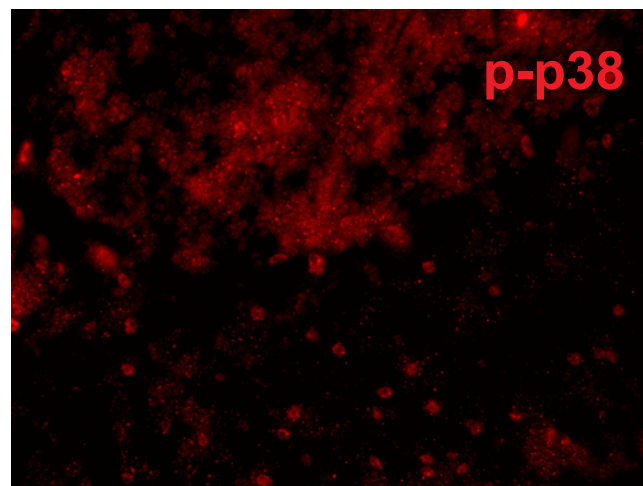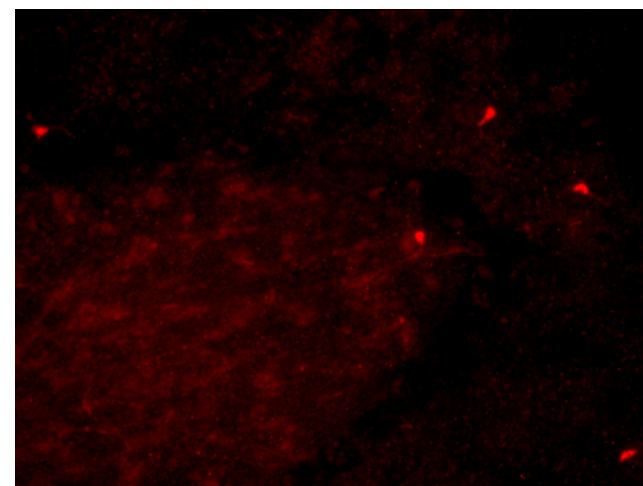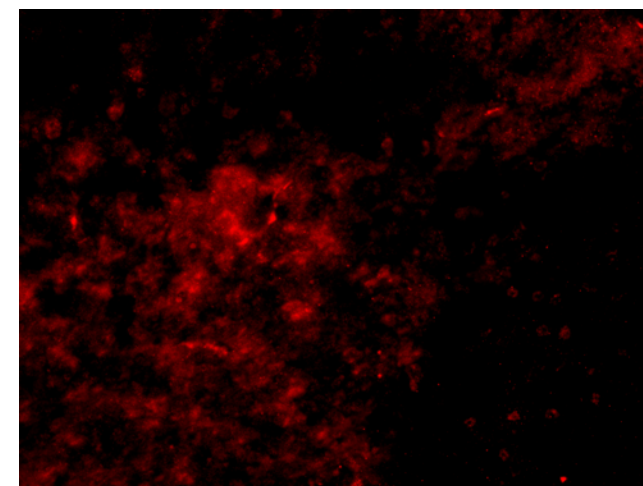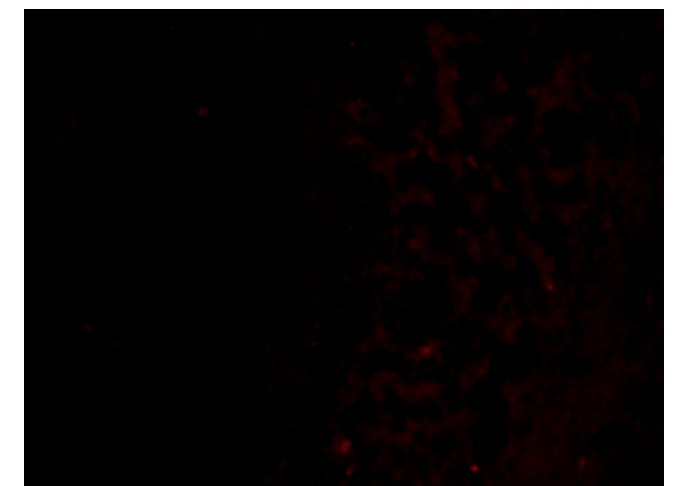

Supplement: MOESM5 [file 16255416]
