# Supplementary material for: Ibuprofen prevents progression of ataxia telangiectasia symptoms in ATM-deficient mice
Source: PubMed Central journal article supplement (PMC6220455; doi:10.1186/s12974-018-1338-7), 2018-11-06

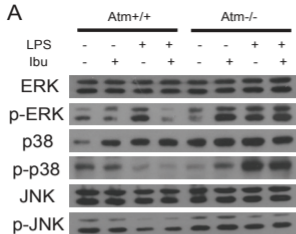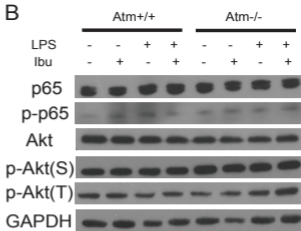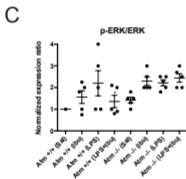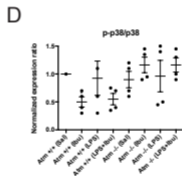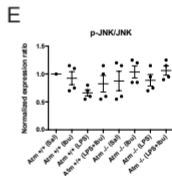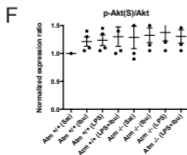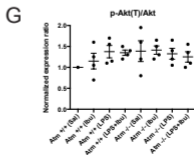

Supplement: 12974_2018_1338_MOESM4_ESM.pdf [file 12974_2018_1338_MOESM4_ESM.pdf]
