# Supplementary material for: Ibuprofen prevents progression of ataxia telangiectasia symptoms in ATM-deficient mice
Source: Springer Nature journal article supplement (doi:10.1186/s12974-018-1338-7), 2018-11-06

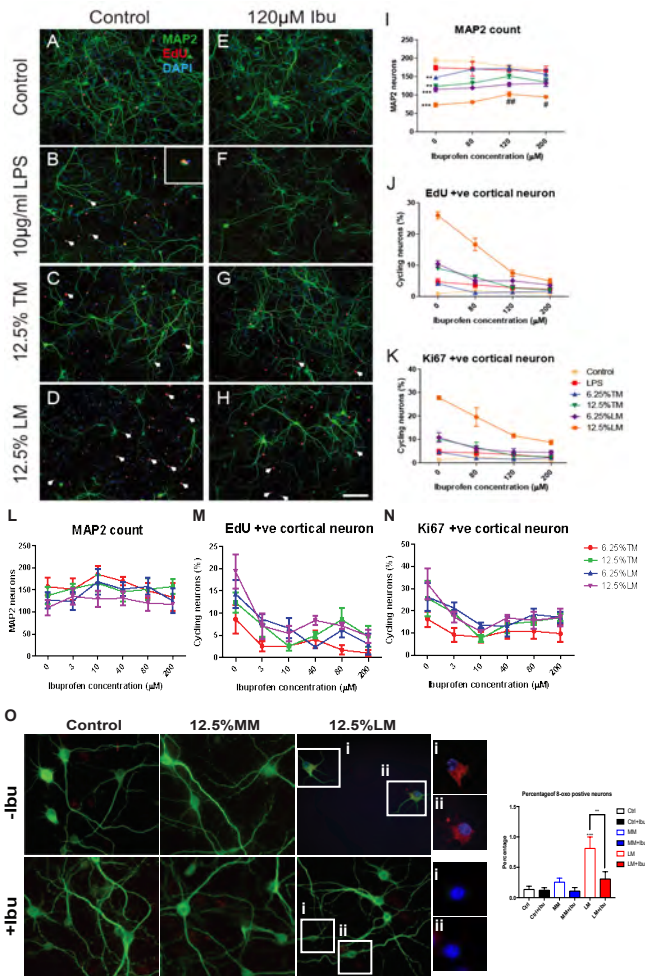

Supplement: MOESM2 [file 16255416]
